# Supplementary material
Source: PubMed Central journal article supplement (PMC9800328)
Supplement: mmc1.pdf [file mmc1.pdf]

**Table S1.** Primers used in this study. The gene symbols followed the Zebrafish Nomenclature Guidelines ([http://zfin.org/zf\\_info/nomen.html](http://zfin.org/zf_info/nomen.html)). Ena, European Nucleotide Archive.

| Gene                 | ENA or ENSEMBL accession number | Name | Sequence (5'→3')           | Use                                     |
|----------------------|---------------------------------|------|----------------------------|-----------------------------------------|
| <i>rps11</i>         | NM_213377.1                     | F    | ACAGAAATGCCCCCTTCACTG      | RT-qPCR                                 |
|                      |                                 | R    | GCCTCTTCTCAAACCGGTTG       |                                         |
| <i>il1b</i>          | NM_212844.2                     | F    | GCCTGTGTGTTTGGGAATCT       |                                         |
|                      |                                 | R    | TGATAAACCAACCGGGACA        |                                         |
| <i>nfk1</i>          | ENSDARG00000105261.2            | F    | TTCTTCTGGTCACGTGCAG        |                                         |
|                      |                                 | R    | ACTCTCAGCATCCGCATCTT       |                                         |
| <i>tnfa</i>          | NM_212859.2                     | F    | GCGCTTTTCTGAATCCTACG       |                                         |
|                      |                                 | R    | TGCCAGTCTGTCTCCTTCT        |                                         |
| <i>cxcl8a</i>        | XM_001342570.7                  | F    | GTCGCTGCATTGAAACAGAA       |                                         |
|                      |                                 | R    | CTTAACCCATGGAGCAGAGG       |                                         |
| <i>il10</i>          | NM_001020785.2                  | F    | AACTCAAGCGGGATATGGTG       |                                         |
|                      |                                 | R    | ATCAAGCTCCCCATAGCTT        |                                         |
| <i>ifng (ifng1r)</i> | NM_001020793.1                  | F    | CTTCAGACAACCAGCGCATA       |                                         |
|                      |                                 | R    | TTTTCCAACCCAATCCTTTG       |                                         |
| <i>ptgs2a</i>        | NM_153657.1                     | F    | TGGATCTTTCCTGGTGAAGG       |                                         |
|                      |                                 | R    | GAAGCTCAGGGGTAGTGCAG       |                                         |
| <i>ptgs2b</i>        | NM_001025504.2                  | F    | CCCTCATGCCTGATGATTTT       |                                         |
|                      |                                 | R    | CCACCCTTAACACTGCTGGT       |                                         |
| <i>caspa</i>         | NM_131505.2                     | F    | CGACGTCAGGGAGATAAGGC       |                                         |
|                      |                                 | R    | TGGATACTAAGGTTTTGAACGACG   |                                         |
| <i>pycard</i>        | NM_131495.2                     | F    | ATTTTGAGGGCGATCAAGTG       |                                         |
|                      |                                 | R    | GCATCCTCAAGGTCATCCAT       |                                         |
| <i>tlr2</i>          | NM_212812.1                     | F    | CCGCGGCCTCAGTCTGGAAA       |                                         |
|                      |                                 | R    | TGAAGCAACGACCCTGTGCGA      |                                         |
| <i>tlr3</i>          | NM_001013269.3                  | F    | TTACCATCATAACTCGGTGA       |                                         |
|                      |                                 | R    | ACAGCTTCTGCTTAAAAGTG       |                                         |
| <i>tlr4ba</i>        | AY389447.1                      | F    | ACAAAGCTAGTGAAGTGA         |                                         |
|                      |                                 | R    | CCGTGTTGTAAATAGTGCTC       |                                         |
| <i>tlr4bb</i>        | NM_212813.2                     | F    | AGAGGCATATGCAATCTGGAGC     |                                         |
|                      |                                 | R    | ATACATCTGGCTCTTAAACTCACA   |                                         |
| <i>tlr7</i>          | XM_021479060.1                  | F    | GAGAGGAATGATGTTATCGTA      |                                         |
|                      |                                 | R    | GGAAGAGATGGCTGGAGATGG      |                                         |
| <i>il1b</i>          | ENSDARG00000098700              | F    | TCATGATGACTTTTGTGGAGAGAAAA | Target sequence amplification from gDNA |
|                      |                                 | R    | GTAACCTGTACCTGGCCTGC       |                                         |
| <i>tlr2</i>          | ENSDARG00000037758              | F    | GGGACCTGCTCCAATCTTCAA      | Target sequence amplification from gDNA |
|                      |                                 | R    | ACATGGACCTCAGCCAGAATC      |                                         |

**Table S2.** crRNA used in this study. The gene symbols followed the Zebrafish Nomenclature Guidelines ([http://zfin.org/zf\\_info/nomen.html](http://zfin.org/zf_info/nomen.html)).

| <b>Gene</b> | <b>Name</b>       | <b>Sequence (5'→3')</b> |
|-------------|-------------------|-------------------------|
| <i>il1b</i> | Dr.Cas9.IL1B.1.AA | CAGGCCGTCACTGAGAGC      |
| <i>tlr2</i> | Dr.Cas9.TLR2.1.AA | GGTCAAGGCTTGATCGGTCG    |
