# Supplementary material
Source: PubMed Central journal article supplement (PMC9800328)
Supplement: mmc2.pdf [file mmc2.pdf]

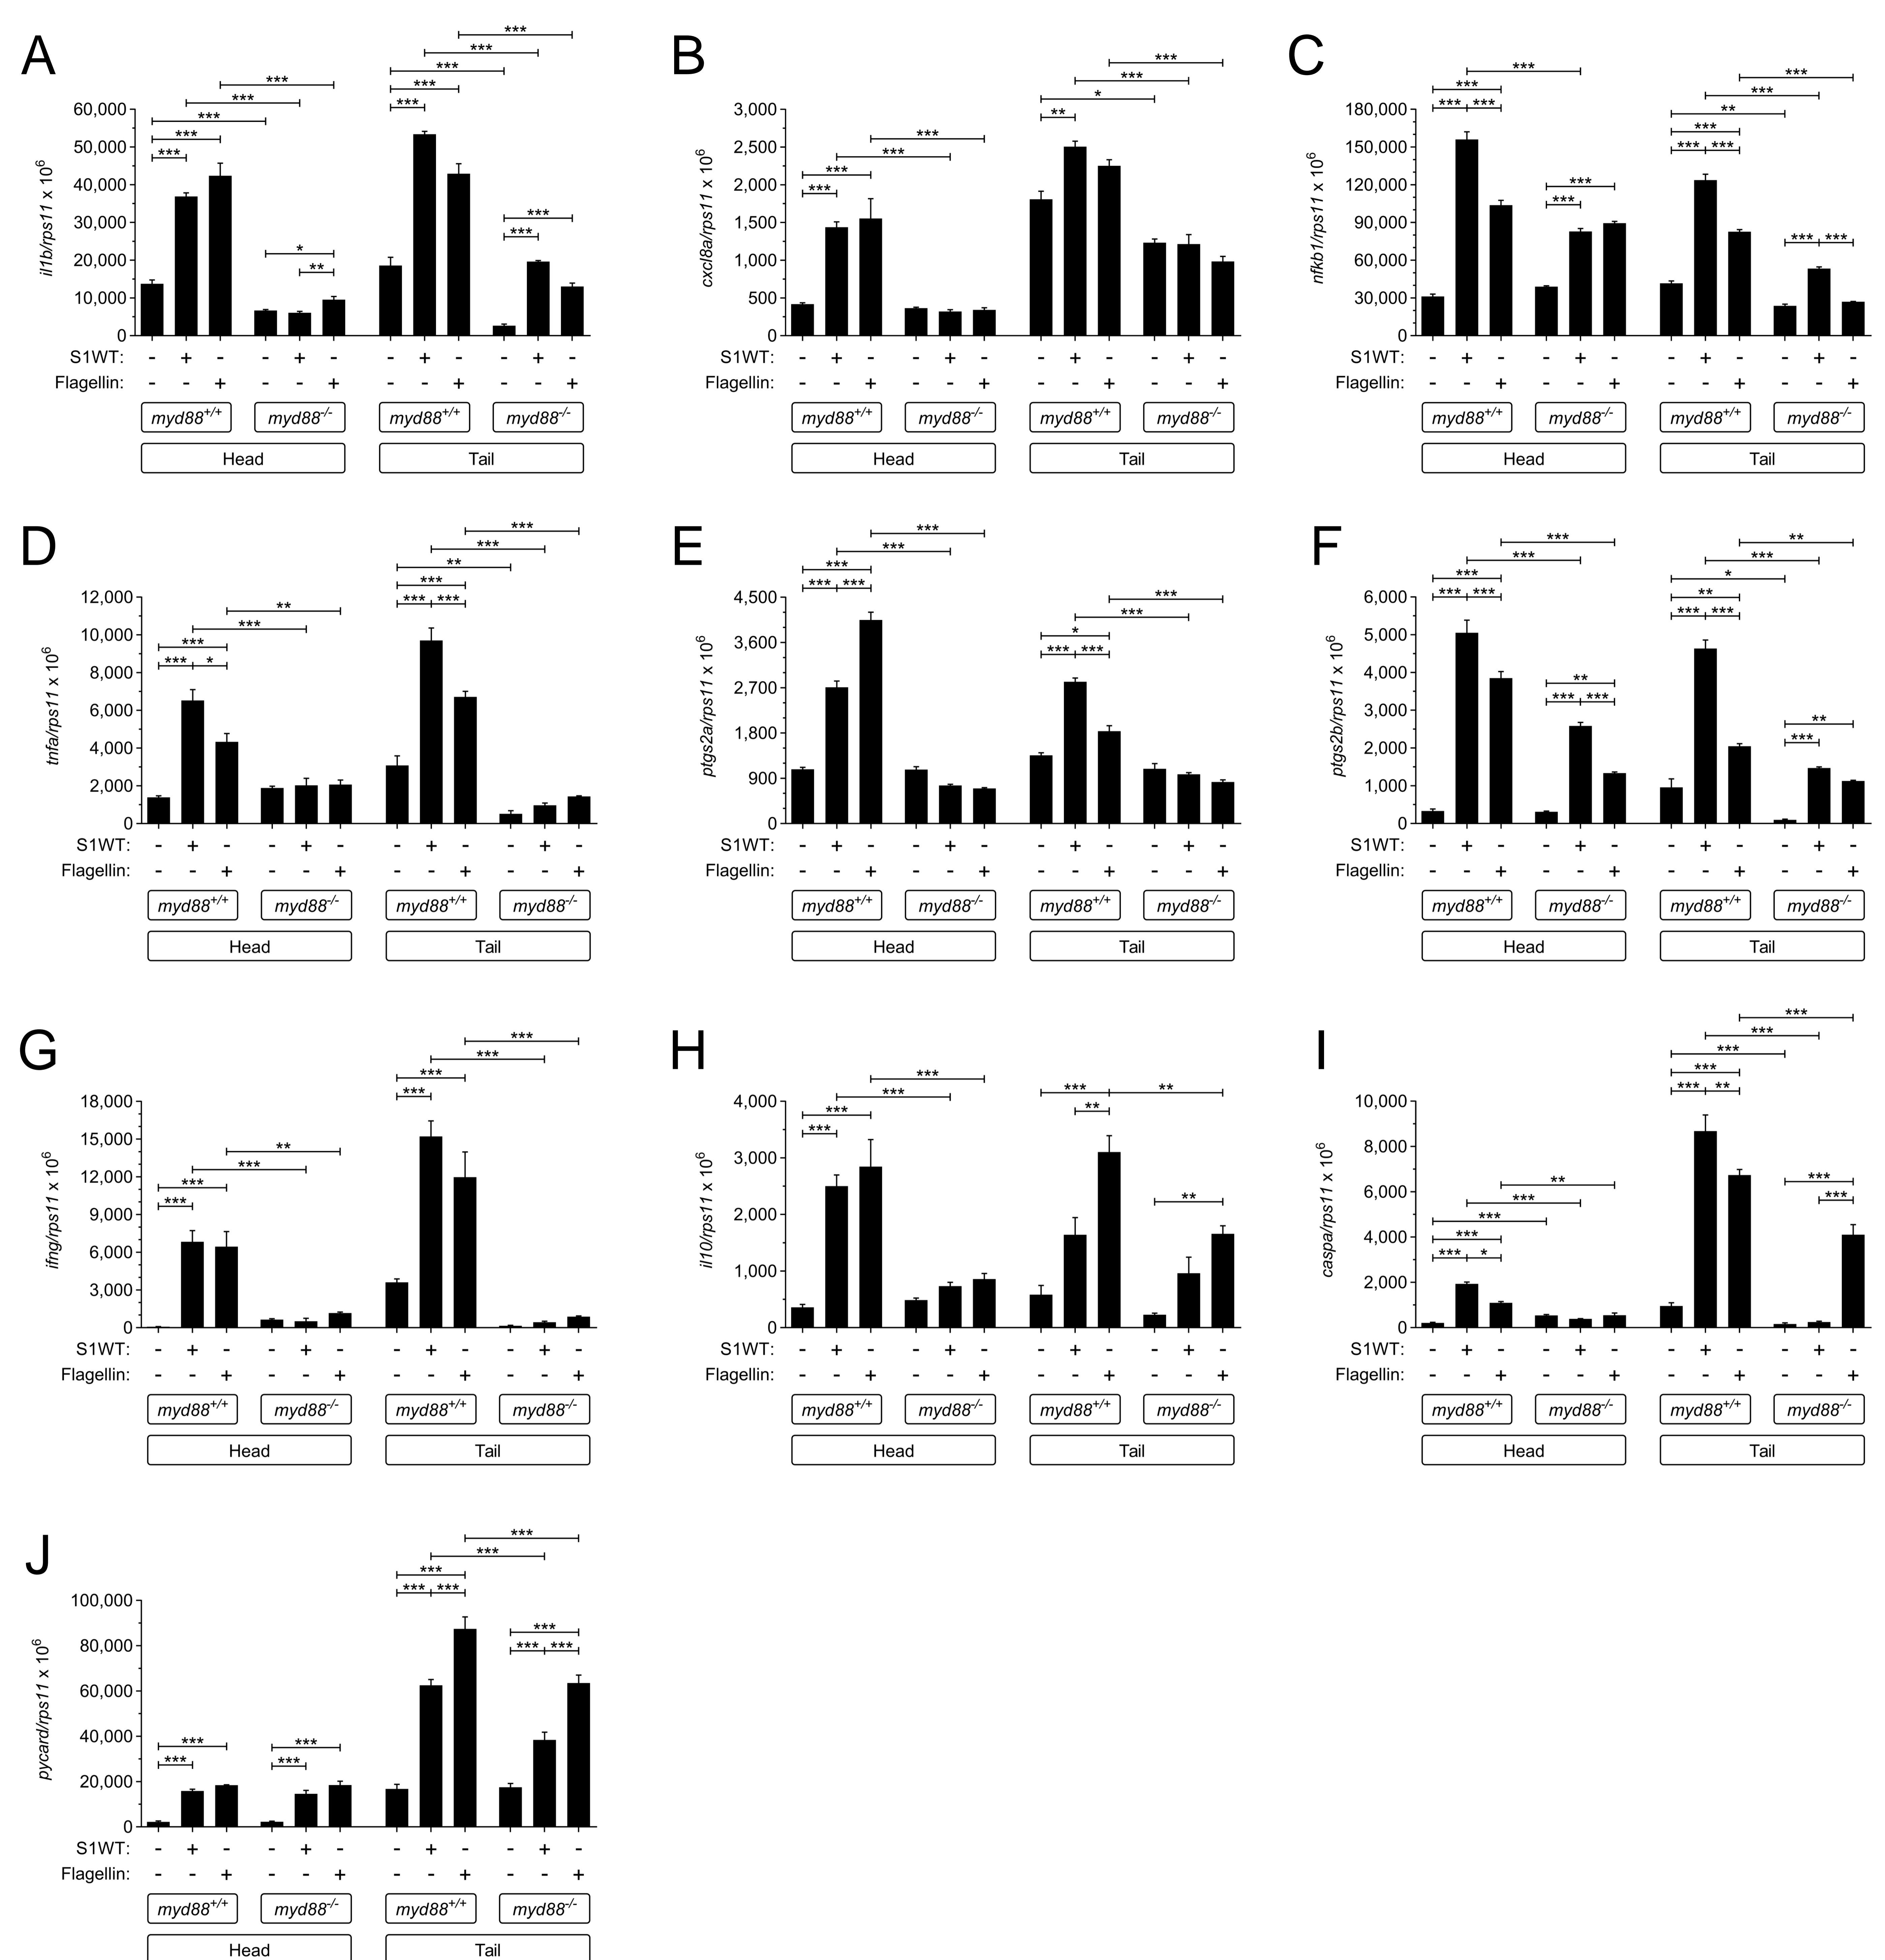

**Figure S1 (related to Figure 1). Gene expression analysis of wild type and Myd88-deficient larvae injected with wild type S1.** Recombinant S1WT (+) or vehicle (-) were injected in the hindbrain ventricle of 2 dpf wild type and Myd88-deficient larvae, and the transcript levels of the indicated genes were analyzed at 12 hpi by RT-qPCR in larval head and tail. Data are shown as mean ± S.E.M. P values were calculated using one way ANOVA and Tukey multiple range test. ns, not significant, \* $\leq p < 0.05$ , \*\* $p < 0.01$ , \*\*\* $p < 0.001$ .

## A: *crll1b*

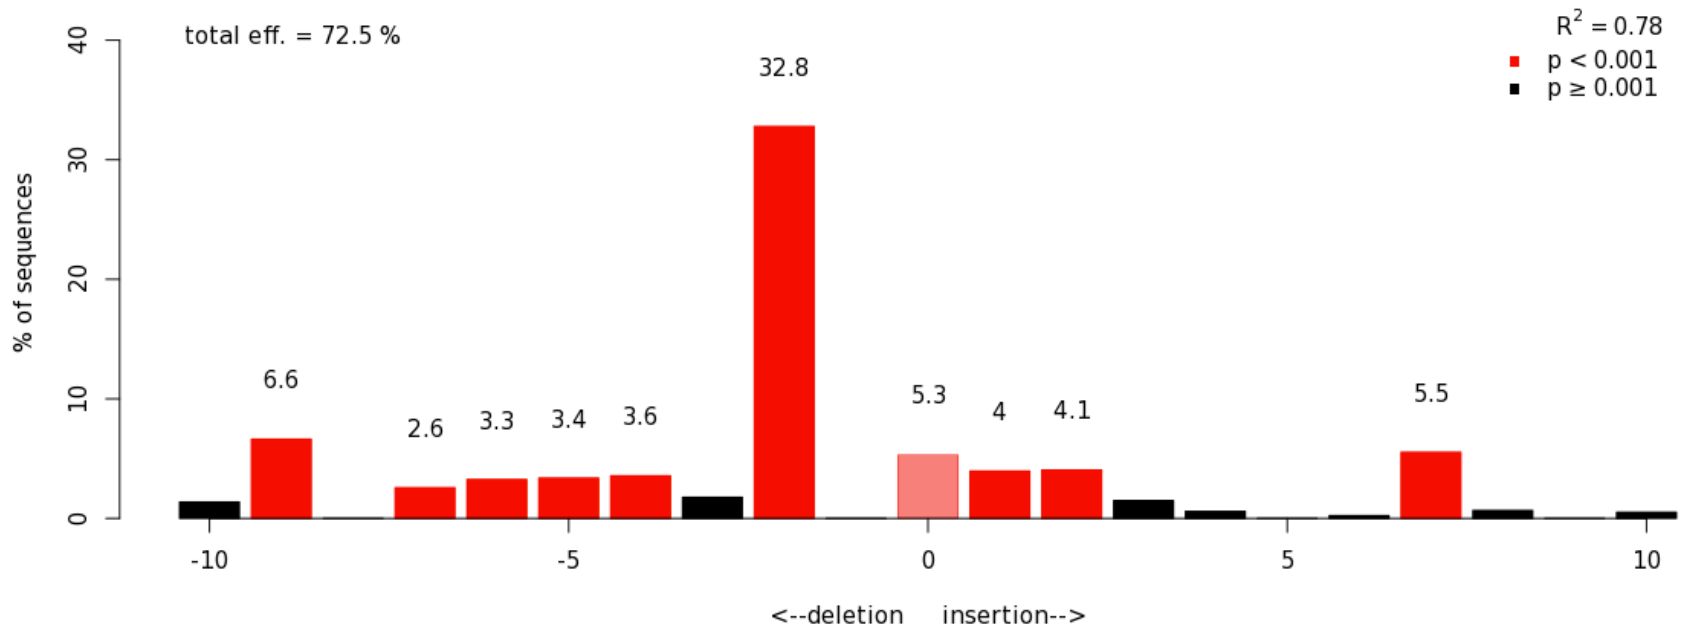

## B: *crTlr2*

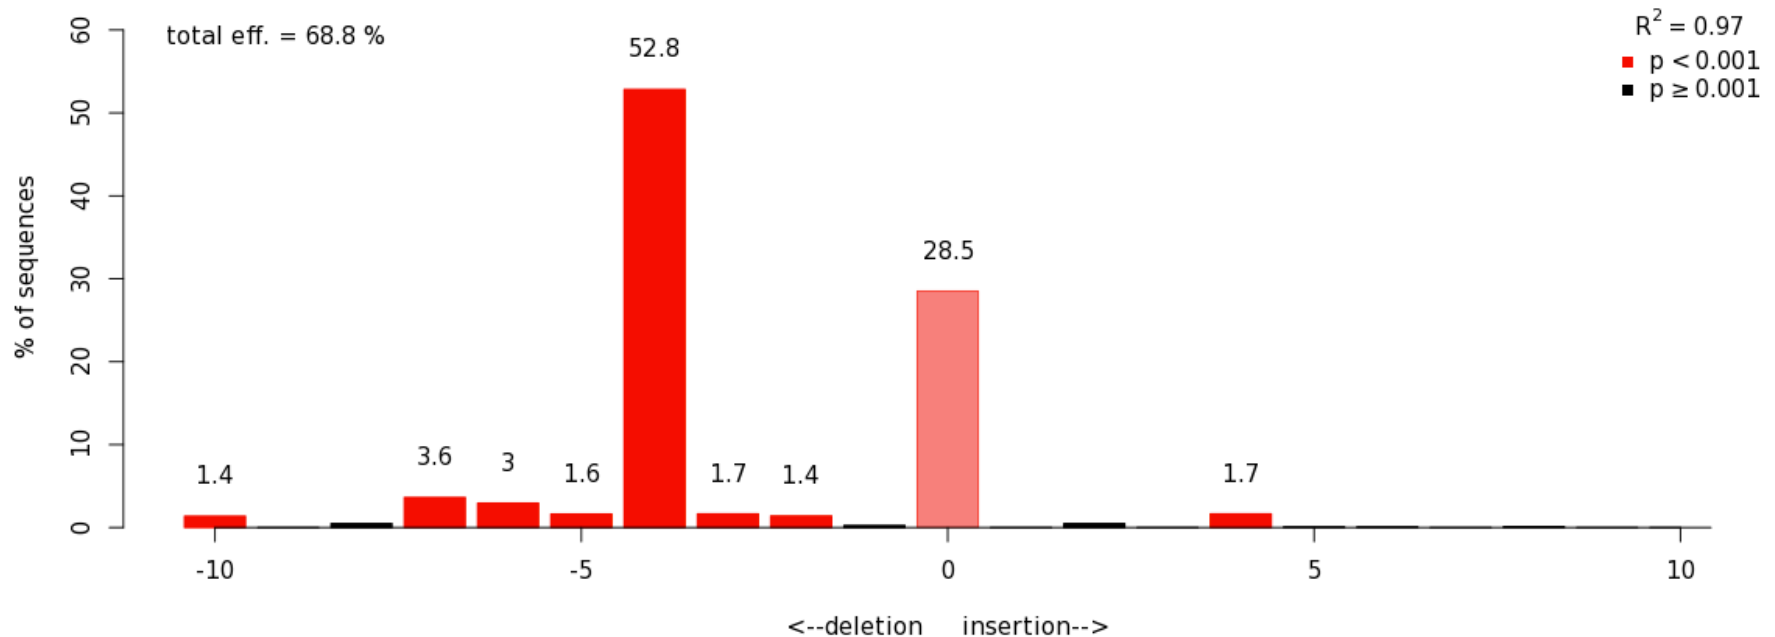

**Figure S2 (related to Figures 2 and 3).** Analysis of genome editing efficiency in larvae injected with *illb* (A) and *tlr2* (B) crRNA/Cas 9 complexes and quantification rate of nonhomologous end joining mediated repair showing all insertions and deletions (INDELS) at the target site using TIDE (<https://tide.nki.nl>).

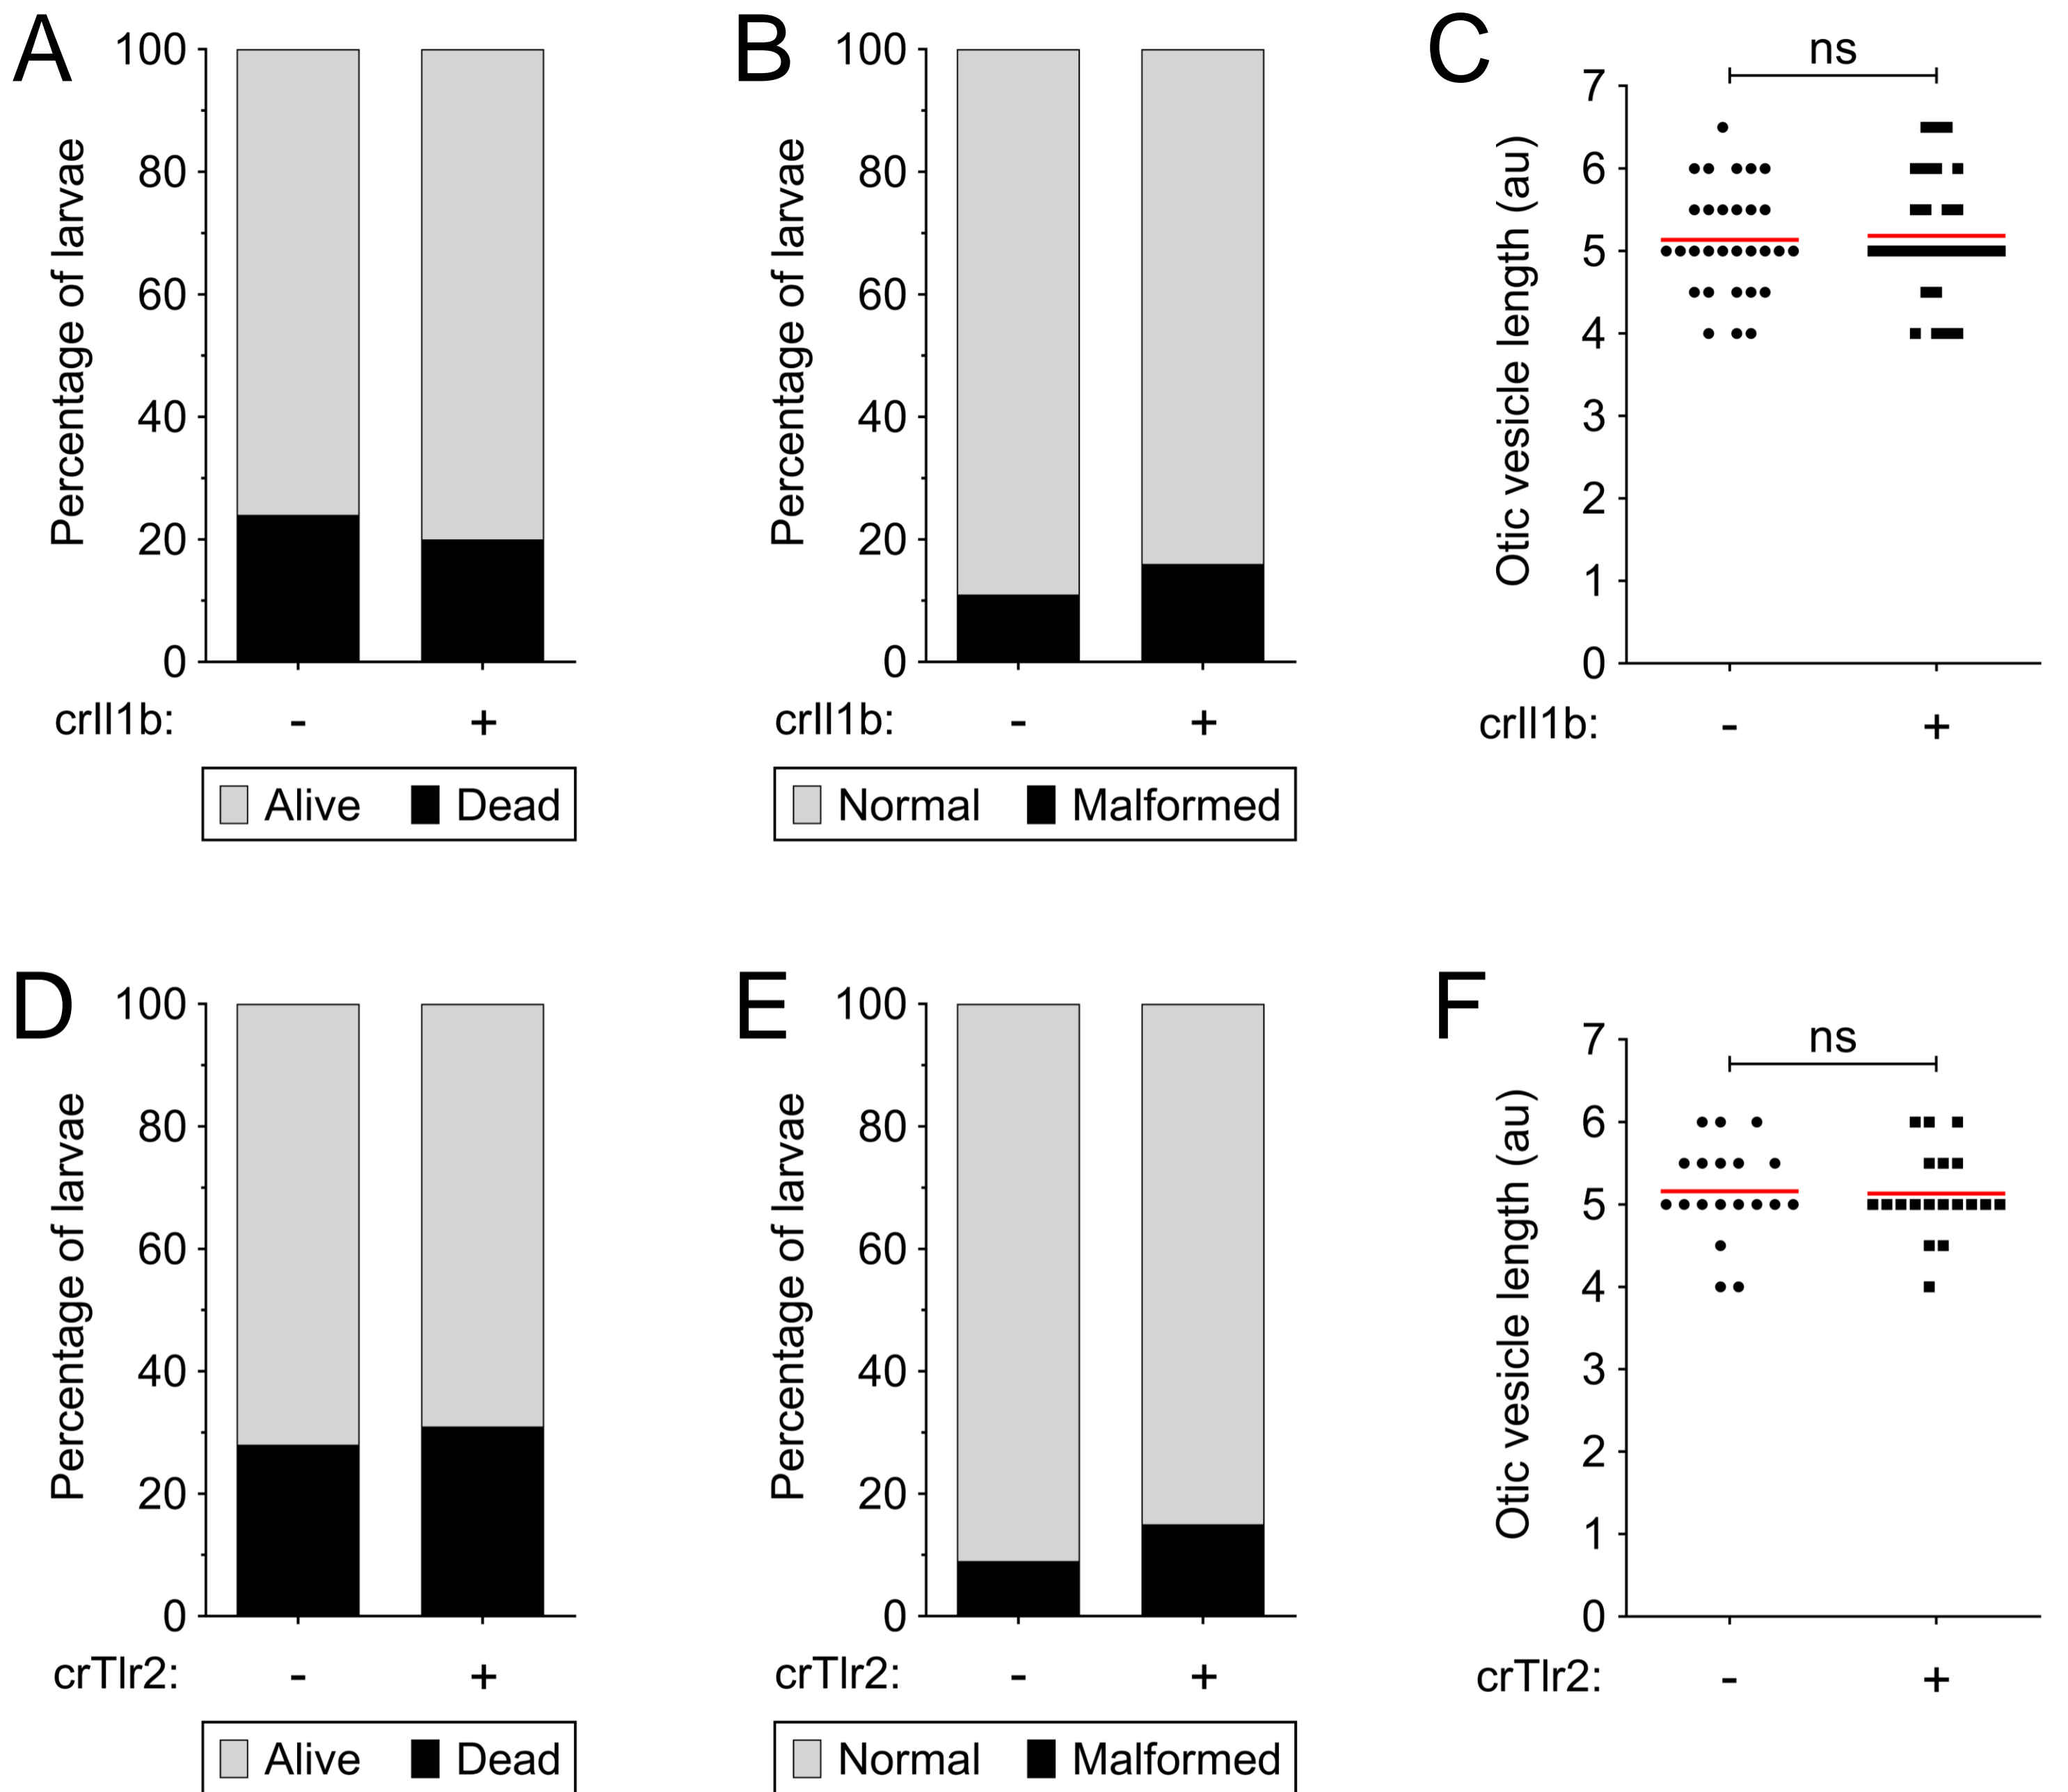

**Figure S3 (related to Figures 2 and 3). *Il1b* and *Tlr2* deficiencies do not affect larval development.** The percentage of dead/alive (A, D) and malformed embryos (B, E), and the developmental stage (C, F) of *Il1b*- (A-C) and *Tlr2*-deficient (D-F) embryos was determined at 24 hpf. au, arbitrary units.

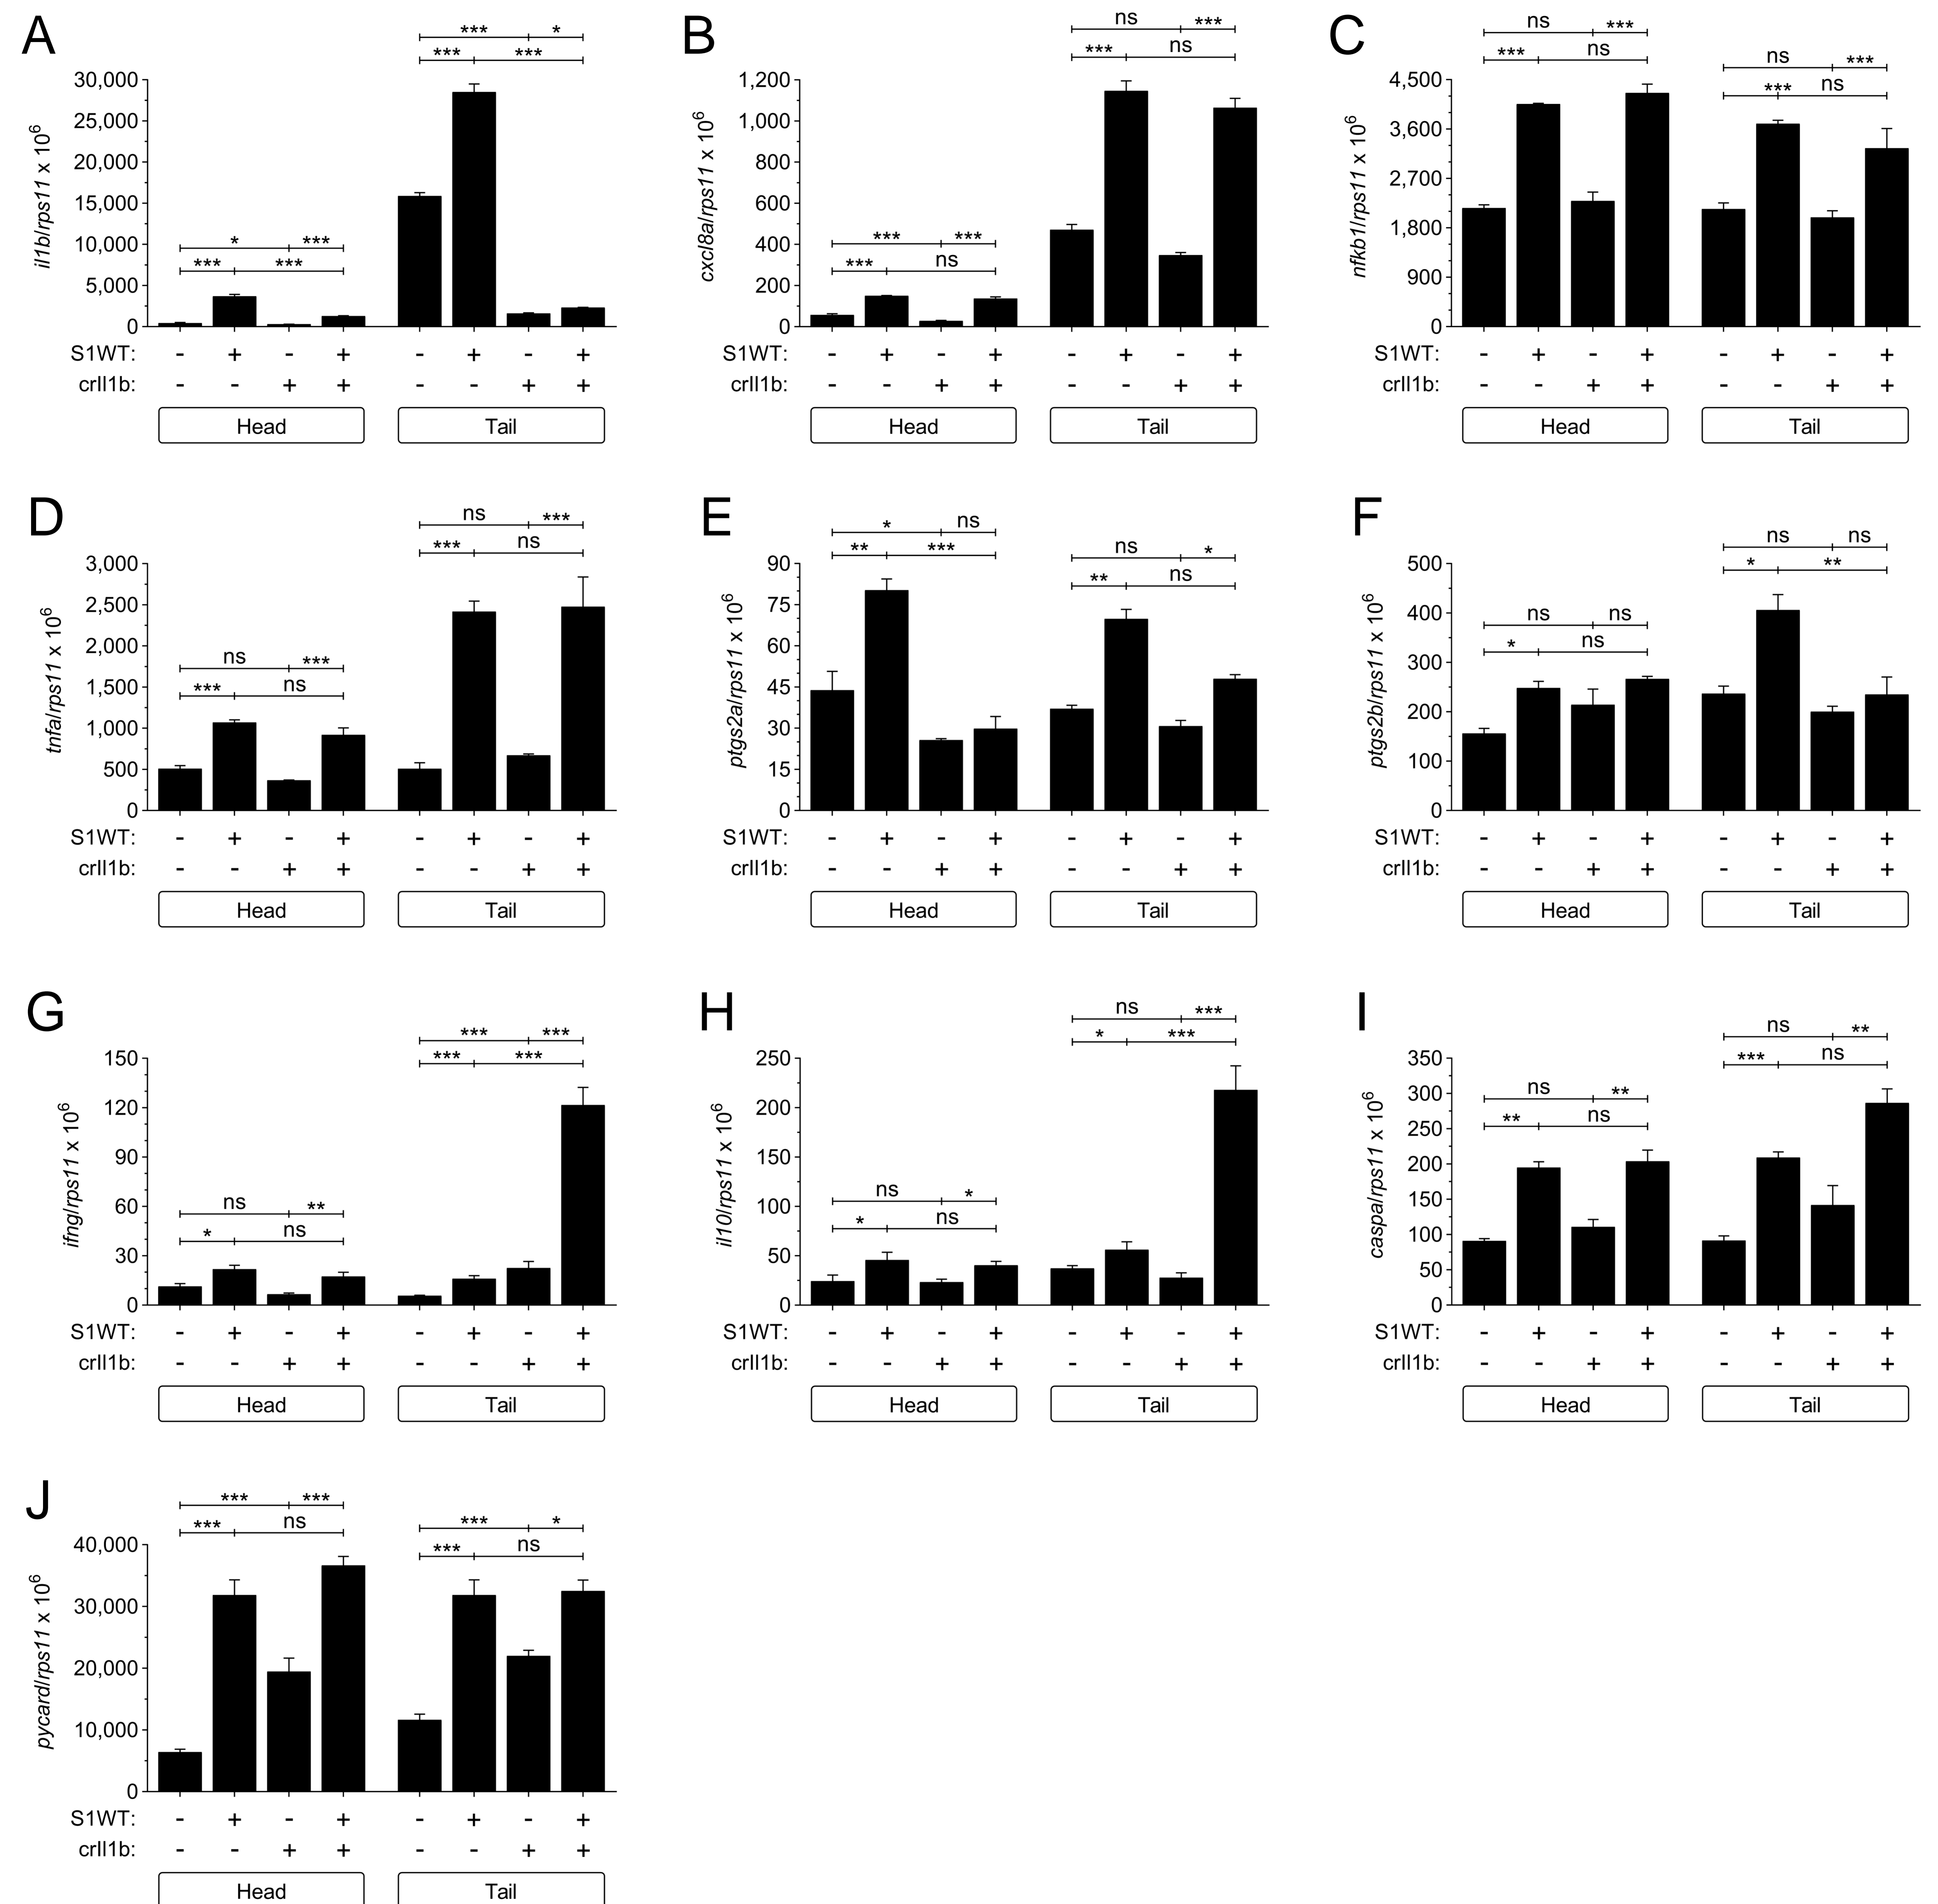

**Figure S4 (related to Figure 2).** Gene expression analysis of wild type and *Il1b*-deficient larvae injected with wild type S1. Recombinant S1WT (+) or vehicle (-) were injected in the hindbrain ventricle of 2 dpf wild type and *Il1b*-deficient larvae, and the transcript levels of the indicated genes were analyzed at 12 hpi by RT-qPCR in larval head and tail. Data are shown as mean ± S.E.M. P values were calculated using one way ANOVA and Tukey multiple range test. ns, not significant, \* $p \leq 0.05$ , \*\* $p \leq 0.01$ , \*\*\* $p \leq 0.001$ .

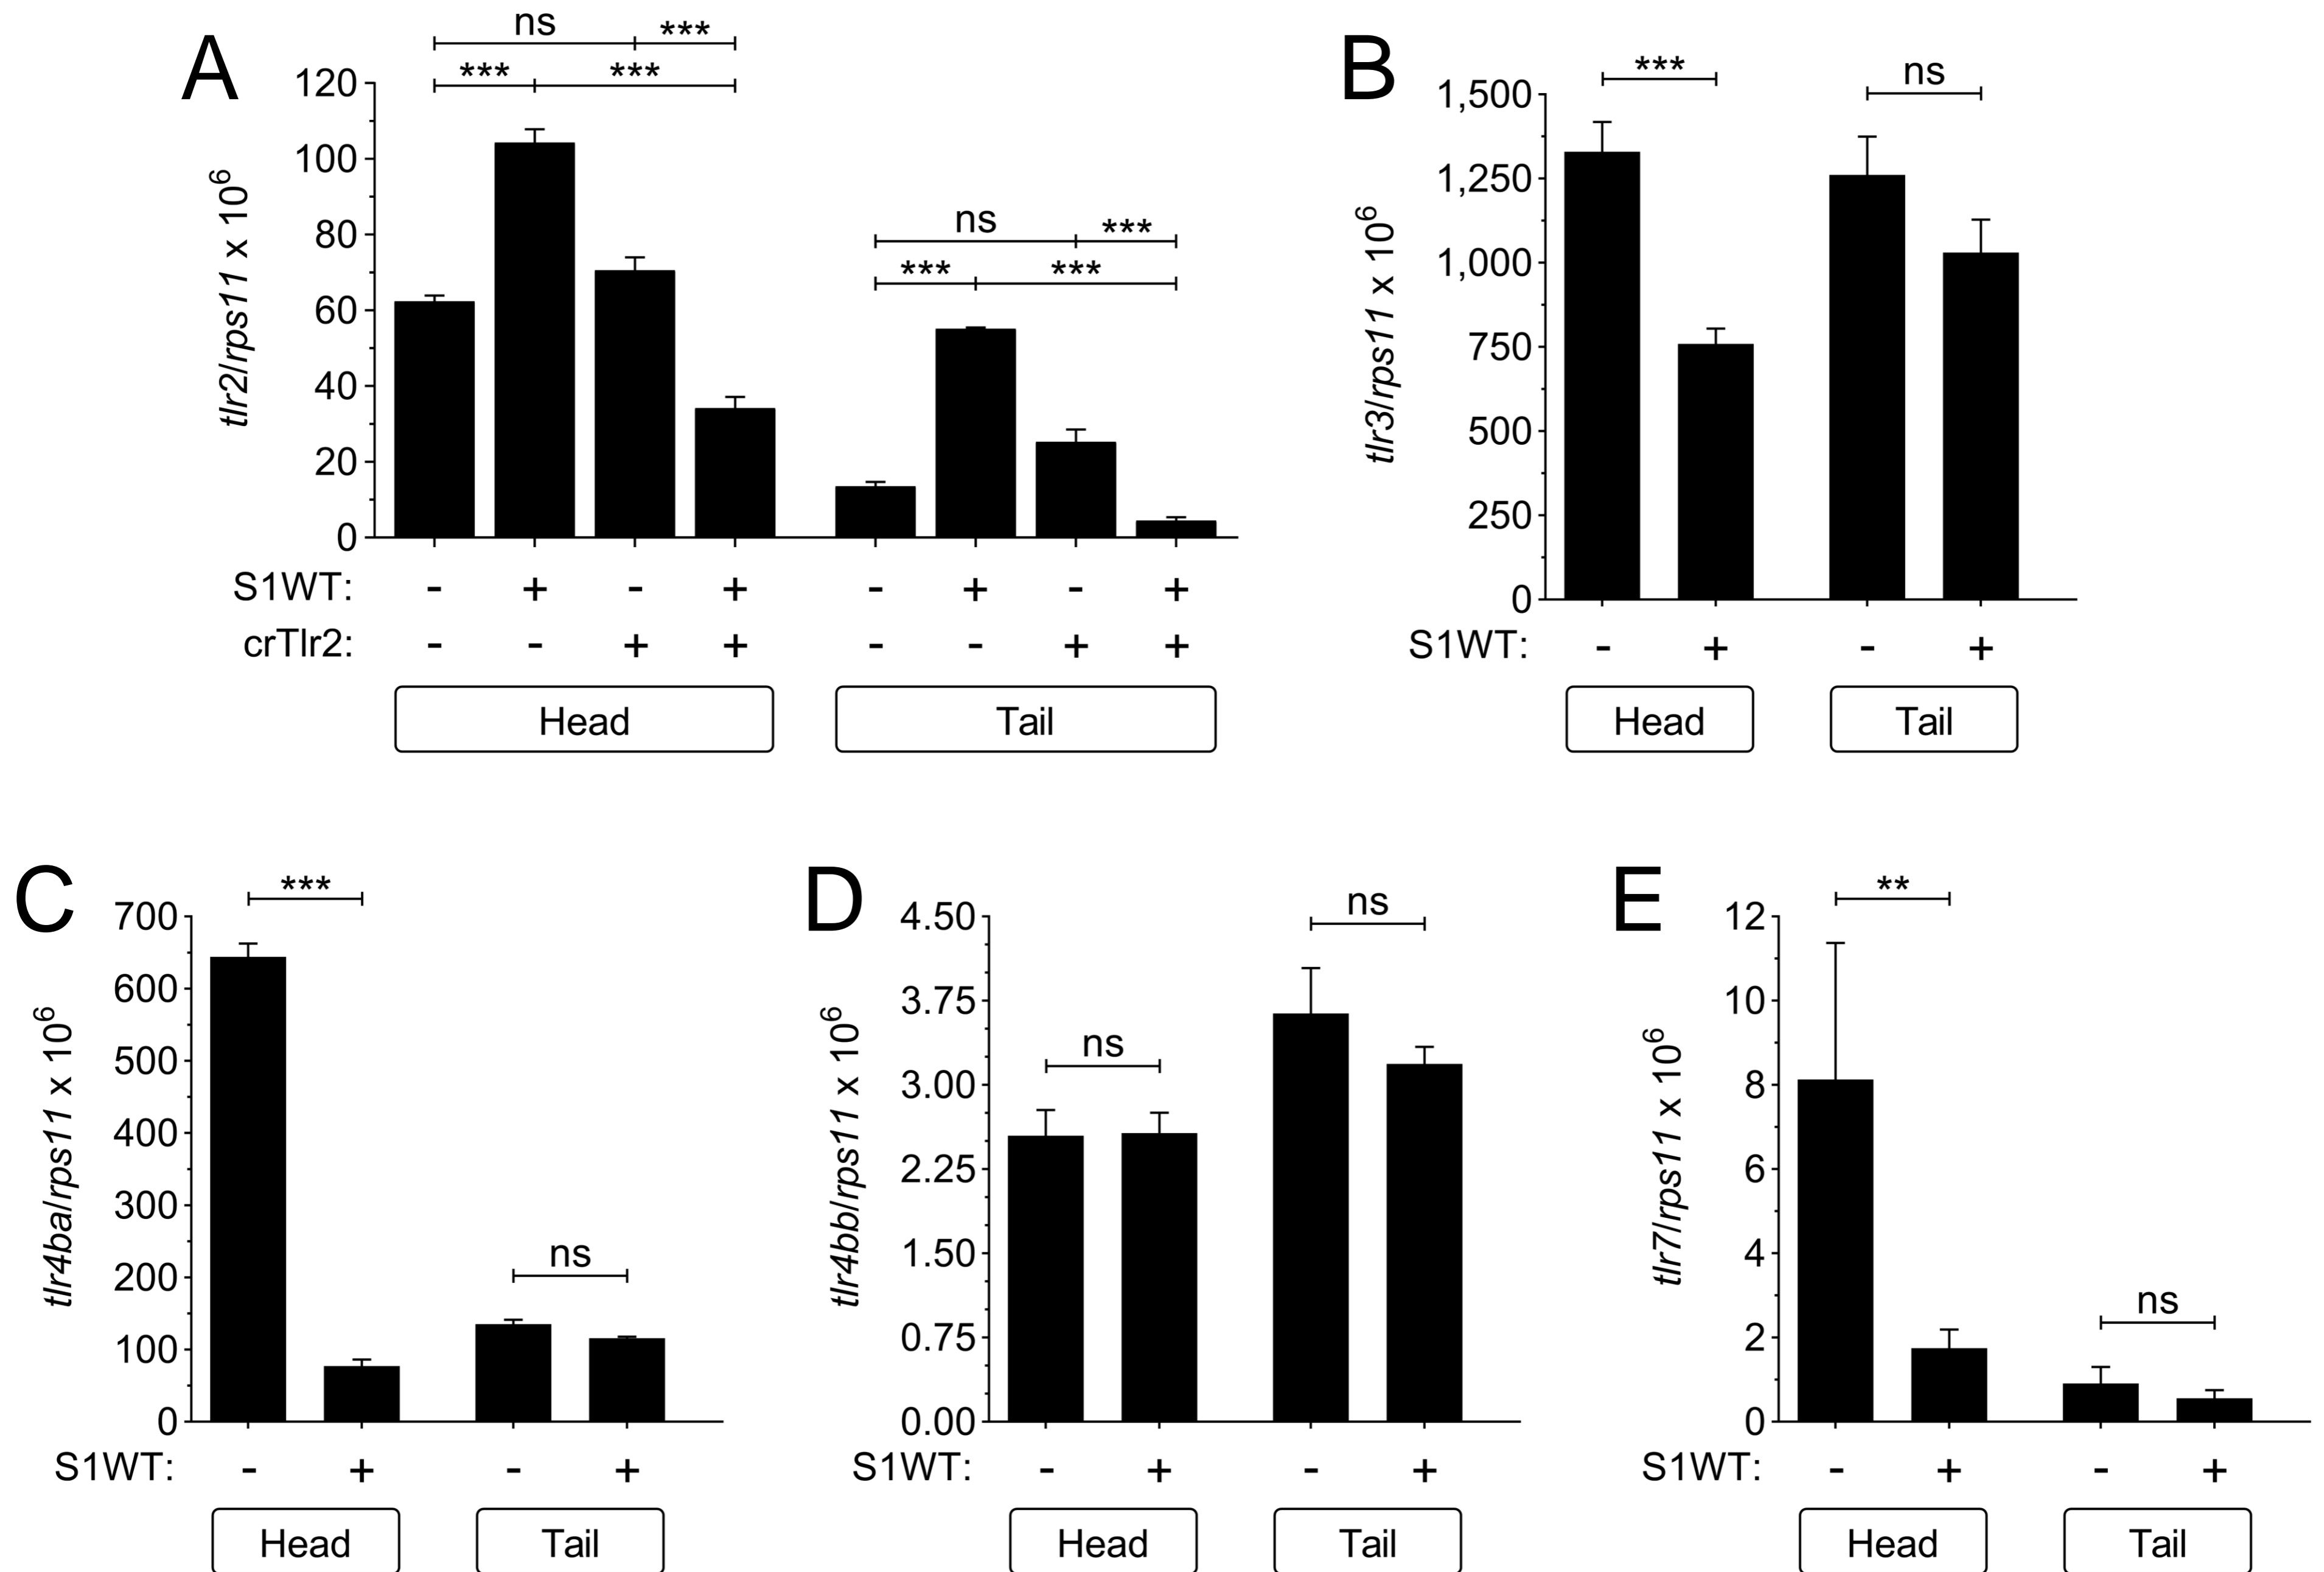

**Figure S5 (related to Figure 3). Tlr expression analysis of wild type and Tlr2-deficient larvae injected with wild type S1.** Recombinant S1WT (+) or vehicle (-) were injected in the hindbrain ventricle of 2 dpf wild type and Tlr2-deficient larvae, and the transcript levels of the indicated *tlr* genes were analyzed at 12 hpi by RT-qPCR in larval head and tail. Data are shown as mean  $\pm$  S.E.M. P values were calculated using one way ANOVA and Tukey multiple range test. ns, not significant, \*\* $p \leq 0.01$ , \*\*\* $p \leq 0.001$ .

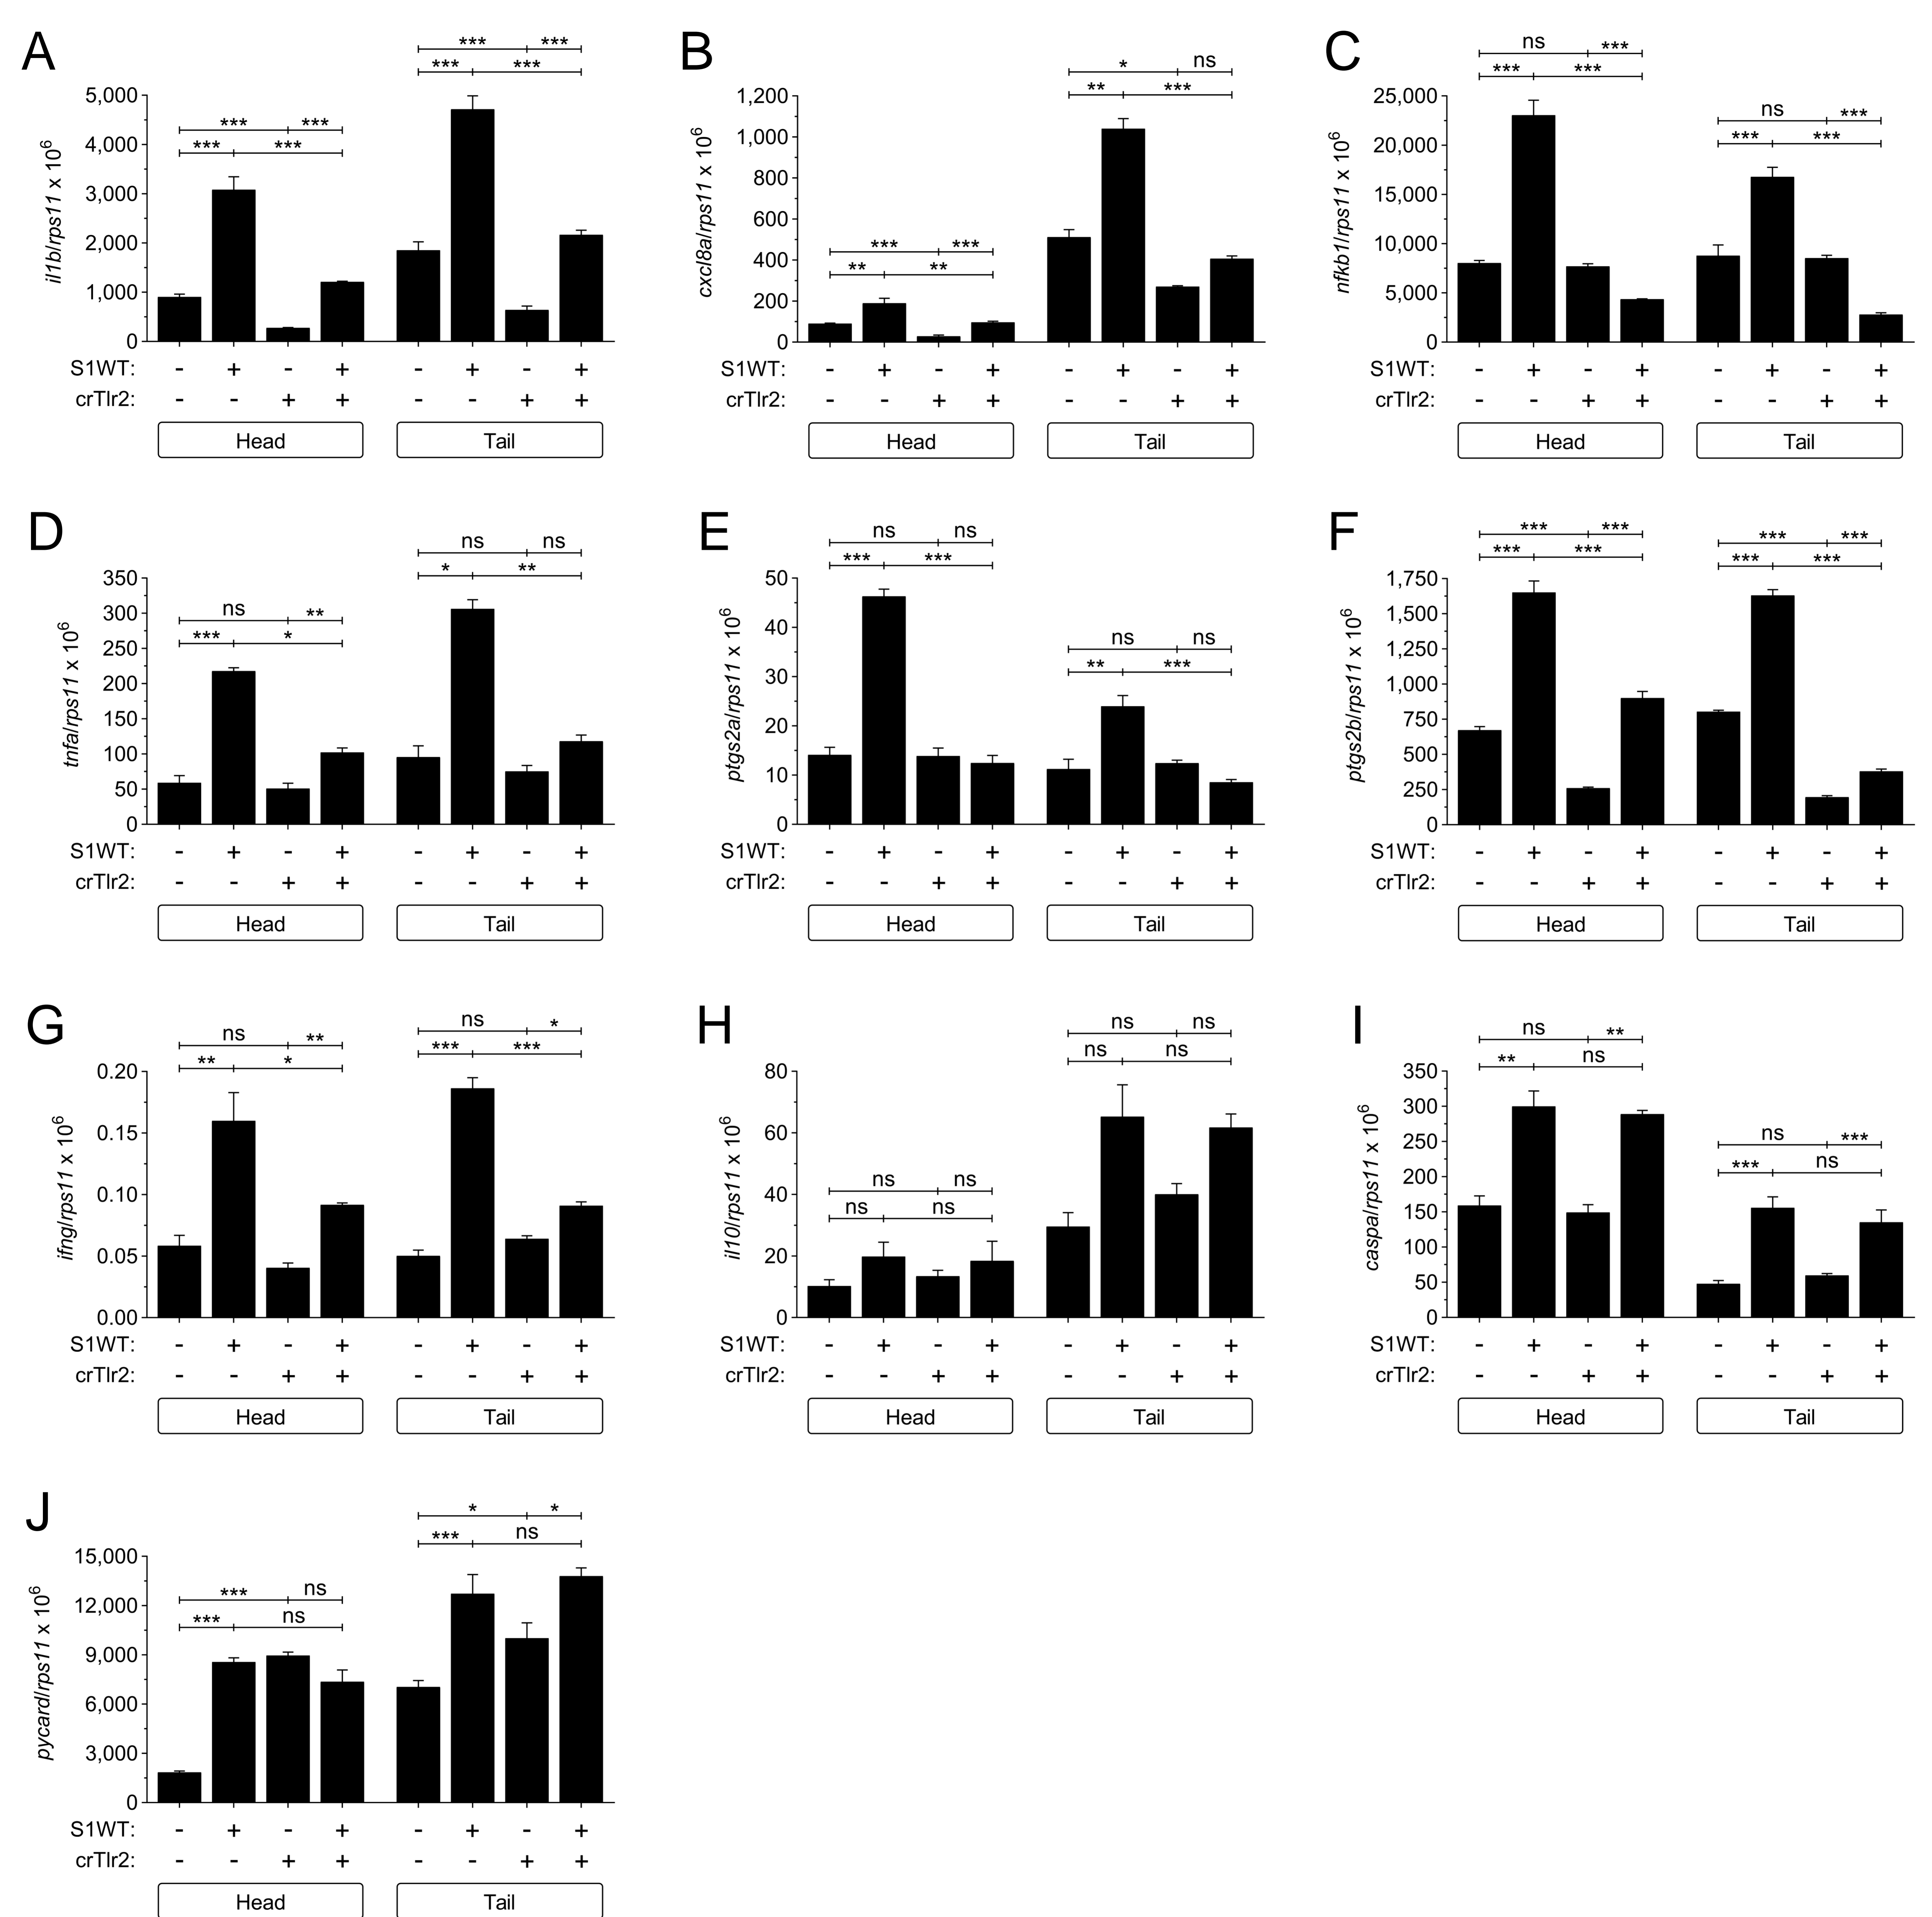

**Figure S6 (related to Figure 3). Gene expression analysis of wild type and Tlr2-deficient larvae injected with wild type S1.** Recombinant S1WT (+) or vehicle (-) were injected in the hindbrain ventricle of 2 dpf wild type and Tlr2-deficient larvae, and the transcript levels of the indicated genes were analyzed at 12 hpi by RT-qPCR in larval head and tail. Data are shown as mean  $\pm$  S.E.M. P values were calculated using one way ANOVA and Tukey multiple range test. ns, not significant, \* $p \leq 0.05$ , \*\* $p \leq 0.01$ , \*\*\* $p \leq 0.001$ .
